# Supplementary material for: Preimplantation Mouse Embryo Selection Guided by Light-Induced Dielectrophoresis
Source: PubMed Central journal article supplement (PMC2854157; doi:10.1371/journal.pone.0010160), 2010-04-13

**(a) KSOM**

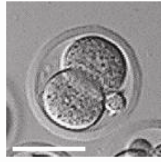

**(b) EP**

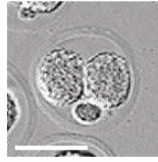

**(c) EP + OET**

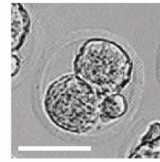

Supplement: pone.0010160.s003.pdf [file pone.0010160.s003.pdf]
